1 TITLE: A low-cost, long-term underwater camera trap network coupled with deep residual  
2 learning image analysis

3  
4 AUTHORS: Stephanie M. Bilodeau<sup>1,2</sup> (corresponding author), Austin W. H. Schwartz<sup>1,2</sup>,  
5 Binfeng Xu<sup>3</sup>, V. Paúl Pauca<sup>3</sup>, and Miles R. Silman<sup>1,2</sup>

6

7 INSTITUTION:

8 1. Department of Biology, Wake Forest University, 1843 Wake Forest Rd, Winston-  
9 Salem, NC 27109

10 2. Center for Energy, Environment, and Sustainability, Wake Forest University,  
11 1843 Wake Forest Rd, Winston-Salem, NC 27109

12 3. Department of Computer Science, Wake Forest University, 1843 Wake Forest  
13 Rd, Winston-Salem, NC 27109

14

15 CORRESPONDING AUTHOR: Stephanie M. Bilodeau

16 *Current address:* Georgia Institute of Technology, School of Biological Sciences,  
17 Atlanta, GA 30332 [sbilodeau@gatech.edu](mailto:sbilodeau@gatech.edu)

18

19

ABSTRACT

20

21

22

23

24

25

26

27

28

29

30

31

32

33

34

35

36

37

38

39

40

1. Understanding long-term trends in marine ecosystems requires accurate and repeatable counts of fishes and other aquatic organisms on spatial and temporal scales that are difficult or impossible to achieve with diver-based surveys. Long-term, spatially distributed cameras, like those used in terrestrial camera trapping, have not been successfully applied in marine systems due to limitations of the aquatic environment.
2. Here, we develop methodology for a system of low-cost, long-term camera traps (**D**ispersed **E**nvironment **A**quatic **C**ameras), deployable over large spatial scales in remote marine environments. We use machine learning to classify the large volume of images collected by the cameras. We present a case study of these combined techniques' use by addressing fish movement and feeding behavior related to grazing halos, a well-documented benthic pattern in shallow tropical reefs. We present a case study of these combined techniques' use by addressing fish movement and feeding behavior related to grazing halos, a well-documented benthic pattern in shallow tropical reefs.
3. Cameras proved able to function continuously underwater at deployed depths (up to 7 m, with later versions deployed to 40 m) with no maintenance or monitoring for over five months, and collected time-lapse images during daylight hours for a total of over 100,000 images. Our ResNet-50-based deep learning model achieved 92.5% overall accuracy in sorting images with and without fish, and diver surveys revealed that the camera images accurately represented local fish communities.
4. The cameras and machine learning classification represent the first successful method for broad-scale underwater camera trap deployment, and our case study

41 demonstrates the cameras' potential for addressing questions of marine animal  
42 behavior, distributions, and large-scale spatial patterns.

43 KEYWORDS: Behavior, camera trap, image classification, long-term, machine learning,  
44 marine, underwater, reefscape, deep learning, landscape of fear

45

46

## INTRODUCTION

47 Terrestrial camera trapping is a growing field and a technique increasingly applied  
48 in global biodiversity monitoring (e.g., Steenweg et al. 2017). Camera traps are remotely  
49 activated cameras that rely on motion and heat sensors to trigger when an animal passes  
50 by. They are used to study species richness (Rowcliffe 2017) and the distribution,  
51 abundance, habitat use, and behavior of wildlife around the world, with many studies  
52 surveying more than one species at a time (Burton et al. 2015). Most camera traps are small,  
53 relatively inexpensive, and often deployed in groups or networks over a wide area for  
54 months at a time. They are typically less invasive and more reliable than comparable  
55 observation techniques (Cutler and Swann 1999). Because they trigger based on the  
56 difference between background radiation and a warm-bodied animal passing through the  
57 sensor's field, camera traps have typically been used to study mammals and birds, although  
58 the field is now expanding to include some ectotherms (Rowcliffe 2017).

59 Comparable techniques for monitoring underwater species face several technical  
60 challenges, chiefly the attenuation of infrared radiation in water, which renders a standard  
61 commercial camera trap unlikely to trigger underwater, except at very close range (Giles  
62 and Bankman 2005), and the rigors of operating in the marine environment where water  
63 intrusion and algal and faunal fouling are persistent issues. The fact that most fish are

64 ectotherms further complicates use of the traditional heat-triggered infrared sensor  
65 technology used in most terrestrial camera traps. Far-red illumination invisible to most fish  
66 provides one potential alternative to infrared (Williams et al. 2014), although far-red light  
67 still attenuates over short distances underwater. Given the ability of sound to propagate  
68 well underwater, acoustic techniques provide another possible alternative to infrared  
69 sensing (Giles and Bankman 2005). Acoustic cameras have been used in the past to image  
70 sharks and other fish in low-light, turbid environments, replacing light-based imaging  
71 entirely (McCauley et al. 2016). This suggests that acoustic techniques could also be used  
72 to trigger conventional optical cameras.

73       Due to the power requirements of active triggering (far-red light, sonar) and  
74 recording methods, current underwater fish monitoring and measurement techniques are  
75 either limited by short battery life and operate on the scale of hours, as with baited remote  
76 underwater video (BRUV) and similar short-term recording devices (Cappo et al. 2004,  
77 Colton and Swearer 2010, Brooks et al. 2011, Williams et al. 2014, Boussarie et al. 2016)  
78 or require a tethered, external power source (Boom et al. 2014, Marini et al. 2018). Because  
79 of this, the spatial extent, number of cameras, and duration of monitoring for marine  
80 systems are vastly smaller in scope than terrestrial efforts (compare Williams et al. 2014  
81 and Siddiqui et al. 2018 to the TEAM or Snapshot Serengeti datasets described in Beaudrot  
82 et al. 2016, Norouzzadeh et al. 2018, respectively). Even long-term underwater monitoring  
83 with an external power supply may be limited to recording images or video during daylight  
84 hours (e.g., Boom et al. 2014) due to the difficulties of avoiding reflected particulate matter  
85 in underwater images taken at night with direct illumination. Without a side-mounted or  
86 similarly external flash, both white light and infrared images will be obscured by the

87 illumination of biotic and abiotic particulates suspended in the water column, and  
88 continuous illumination may also attract fish and other marine organisms, depending on  
89 the color of the light (Ko et al. 2018). Thus, most long-term underwater observations are  
90 limited with regard to both power and nighttime illumination, and solutions can be costly  
91 and prohibit deployment of underwater cameras in remote locations without access to  
92 external power or consistent upkeep.

93         A related challenge faced by both terrestrial and marine camera traps is the time  
94 cost related to processing and analyzing large photosets obtained from multiple cameras  
95 over the course of months or years (Norouzzadeh et al. 2018). While computer vision  
96 techniques are not yet widespread in the field of camera trapping, they have the potential  
97 to reduce time cost (Rowcliffe 2017) and have already been successfully applied to the  
98 extensive Snapshot Serengeti camera trap dataset (Norouzzadeh et al. 2018) as well as  
99 video frames from cabled or short-term marine cameras (Boom et al. 2014, Siddiqui et al.  
100 2018, Marini et al. 2018, Villon et al. 2018).

101         Here we present a simple design for an affordable, long-running, autonomous  
102 underwater camera based on an existing commercially-available terrestrial model. We  
103 outline the deployment of our Dispersed Environment Aquatic Cameras (DEACs) across a  
104 270 km<sup>2</sup> tropical reefscape, our testing, and our subsequent analysis of the 100,000+  
105 images obtained by implementing a deep convolutional neural network (CNN) technique  
106 for image classification. To demonstrate both the efficacy of our design and the value of  
107 long-term unmanned underwater observations to marine ecology research, we present a  
108 case-study in fish feeding behavior as it relates to a well-documented benthic pattern at  
109 Lighthouse Reef Atoll, Belize.

110

111

## METHODS

### 112 **Design**

#### 113 *Camera Selection*

114           Cuddeback Silver Series scouting cameras, model 1231 (Cuddeback, Green Bay,  
115 WI, USA), were chosen for their compact size, their relatively high 20 megapixel (MP)  
116 image resolution, and their time-lapse function, which allows images to be taken at pre-  
117 programmed time intervals and certain light levels without requiring the use of additional  
118 video or motion-triggered image settings. This programming flexibility, especially  
119 regarding the time-lapse feature, is not included in multiple similar cameras from other  
120 manufacturers. The cameras were programmed to take 20 MP images every 15 minutes  
121 whenever ambient light levels were high enough to allow for color photography without  
122 flash, using the “Day” setting. Nighttime images and video and all infrared sensor-triggered  
123 images and video were disabled to conserve both power and memory space because initial  
124 field tests showed that few or no additional usable images were captured using the infrared,  
125 low-light “Night” setting.

126           Cameras were synchronized to record photos on the hour and every 15 minutes  
127 following to ensure that images from different cameras and sites were captured at the same  
128 time of day and under the same local conditions. The 15-minute interval was chosen to  
129 balance the need for regular observations of reef and seagrass communities that may  
130 include transient fish species and the constraints of storing and processing thousands of  
131 high-resolution images collected by multiple cameras over a months-long deployment. The

132 ability of this interval to adequately capture the community composition and species  
133 present at a given reef was validated using in-person diver surveys (described below).

134 Memory cards were 32 GB SanDisk (Western Digital Corporation, Milpitas, CA,  
135 USA) or Kingston (Kingston Technology Corporation, Fountain Valley, CA, USA)  
136 microSD cards with adapters, capable of holding over 25,000 20 MP color images each.  
137 Each camera required eight Energizer Ultimate Lithium AA batteries (Energizer Holdings,  
138 Inc., St. Louis, MO, USA), which provided enough power for over five months of  
139 continuous function under the settings described here.

140 The total cost of each camera, including the batteries and SD card, came to just  
141 \$125 per unit with the housing (discussed below). The use of pre-built commercial trail  
142 cameras, which are designed for energy efficiency over long deployments, significantly  
143 reduced both material and energy costs, relative to constructing a similar camera from  
144 scratch using components like a Raspberry Pi (Raspberry Pi Foundation, Cambridgeshire,  
145 UK) and GoPro (GoPro, Inc., San Mateo, CA, USA), Canon (Canon, Inc., Ota City, Tokyo,  
146 Japan), or Sony (Sony Corporation, Minato City, Tokyo, Japan) cameras, as used in  
147 previous underwater camera applications (e.g., Brooks et al. 2011, Williams et al. 2014,  
148 Boussarie et al. 2016, Siddiqui et al. 2018, Villon et al. 2018).

149

#### 150 *Housing Construction*

151 Two different housings were tested in the field, both based on commercially  
152 available junction box enclosures. Housing 1, based on item DS-AT-1217-1 available from  
153 “Saipwell” (Saip Electric Group Co., Ltd, Wenzhou, China), has thinner walls (2.4 - 3.9  
154 mm) made of an unspecified plastic. The top secures with specially-shaped plastic screws

155 and it contains an O-ring like insert made of foam. Housing 2, based on model ML-  
156 47F\*1508 from Polycase, Inc. (Avon, OH, USA), is a thick-walled (3.5 - 4.0 mm) design  
157 made of polycarbonate resin secured with stainless steel screws and a silicon rubber gasket.  
158 Both housings had a 2 inch diameter hole drilled in the faceplate and a 3 inch disk of 1/8  
159 inch thick acrylic epoxied to the opening with MarineWeld (J-B Weld Company, Atlanta,  
160 GA, USA) to act as a window. Since both housings used identical acrylic windows and  
161 contained the same cameras, images collected using each design were indistinguishable;  
162 the chief difference between the housings was their pressure tolerance and leakage at depth.  
163 Each housing cost approximately \$30 for all components (included in the total price given  
164 above). Ablative antifouling boat paint was applied to the housing exterior, excluding the  
165 back and acrylic window, of a subset of cameras with Housing 2 to reduce biofouling.

166       Cameras were programmed, armed, and packed inside their housings with  
167 cardboard spacers. Housings were sealed with Star brite marine silicone sealant (Star brite,  
168 Fort Lauderdale, FL, USA) around the seam of the enclosure lid. Silicone sealant was also  
169 used to reinforce the edges of the epoxy seal around the lens window, both inside and  
170 outside.

171

### 172 *Field Installation*

173       Cameras were secured to four-legged bent rebar stands with plastic cable ties  
174 threaded through mounting holes pre-built into the housings (Fig 1). Due to their buoyancy,  
175 camera housings were placed underneath the crossed rebar forming the top of each stand  
176 and secured laterally to the four legs, which were sunk into the sediment to keep the stands  
177 upright. Lightweight plastic or polystyrene buoys were tethered to a small subset of



178 cameras and stands located in particularly shallow water (2 m or less) to prevent collision  
179 by boats.

180

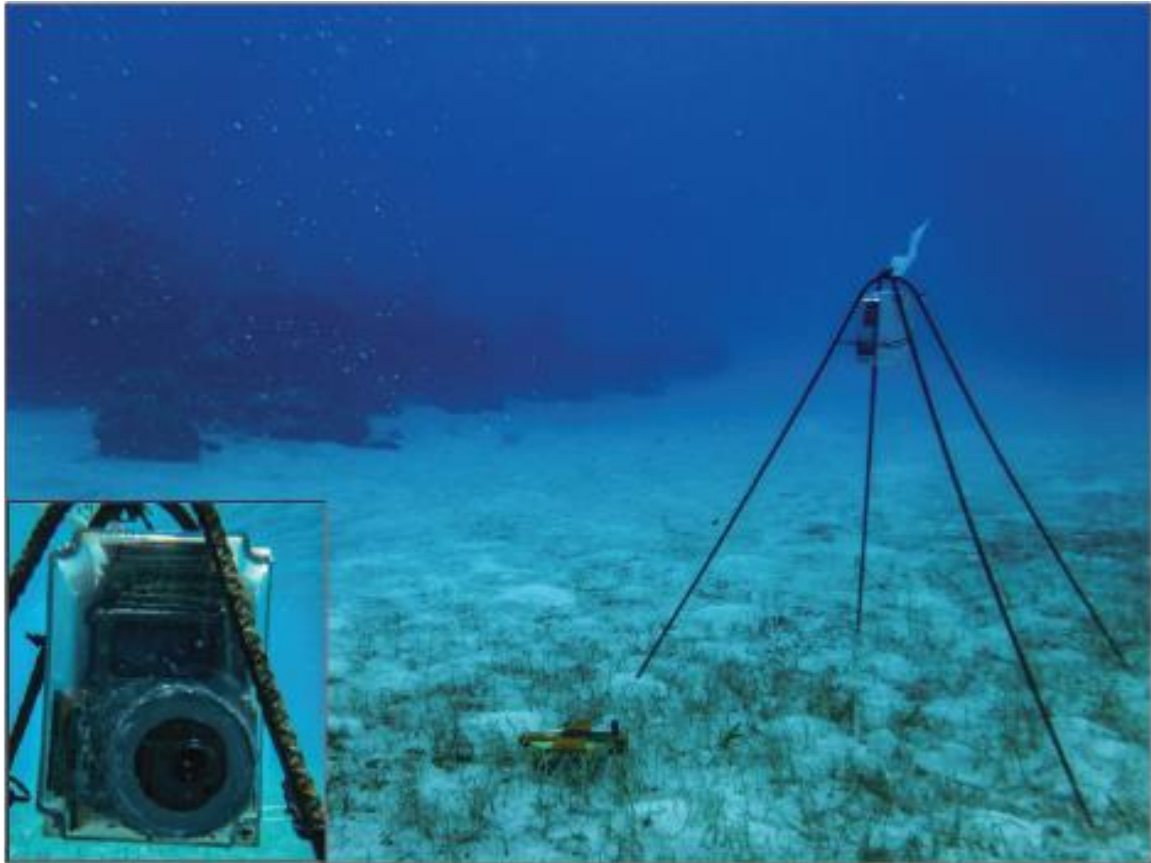

181

182 **Figure 1.** DEACs were deployed on four-legged rebar stands in the field. Plastic cable ties  
183 attached to the camera housing and to the legs were used to secure buoyant cameras in  
184 housings below the crossed rebar at the top of each stand. Bottom left inset: A detailed  
185 front view of a camera in Housing 1 underwater.

186

## 187 **Deployment**

### 188 *Study System and Question*

189 Lighthouse Reef Atoll off the coast of Belize is primarily a shallow (1-8 m depth)  
190 lagoon environment, dominated by scattered patch reefs interspersed with a mosaic of  
191 seagrass, macroalgae, and sand. Although relatively isolated from the mainland, the atoll

192 is subject to heavy local fishing pressure for conch, lobster, and certain fish species. A  
193 small no-take marine protected area (MPA) surrounds the island of Half Moon Caye in the  
194 southeastern corner of the atoll. Because of its shallow benthos, wide variety of benthic  
195 cover types, and spatial variation in protected status, Lighthouse Reef provides an ideal  
196 location to test our DEACs under a variety of conditions. The shallow marine grazing  
197 system of Lighthouse Reef and similar Caribbean locations is in many ways analogous to  
198 terrestrial grazing systems like the African savanna (Burkepile 2013), where camera trap  
199 networks have been effectively deployed for years (e.g., Norouzzadeh et al. 2018).

200         To structure our testing and demonstrate the utility of the DEACs for addressing  
201 ecological questions at large spatial scales, we organized our deployments around a  
202 widespread benthic pattern particularly prominent at Lighthouse Reef: grazing halos.  
203 Grazing halos consist of a bare sand or lightly vegetated border surrounding a coral patch  
204 or similar underwater structure that separates the reef from surrounding dense vegetation  
205 (i.e. seagrass or algae). The heightened grazing observed inside these halos could be due  
206 to a landscape of fear (e.g., Hammerschlag et al. 2015), where herbivores are afraid to  
207 venture past a threshold distance from the reef due to predation risk (Madin et al. 2011).  
208 At Lighthouse Reef, grazers are mostly large parrotfishes (Scaridae) and surgeonfishes  
209 (Acanthuridae). However, this threshold of fish density could also be due simply to the  
210 natural dispersion of grazers as they venture farther from the reef, which serves as a central  
211 aggregating structure for many fish (Sale and Douglas 1984, Bohnsack 1989, Layman et  
212 al. 2013). We proposed that if a strong landscape of fear is in effect, herbivorous species  
213 observed and photographed in the halo will never venture out into the surrounding seagrass,  
214 except perhaps when traveling in schools. However, a simple drop-off in fish density with

215 distance would still result in the occasional grazing reef fish being seen by our cameras,  
216 and if reef fishes are food limited rather than predator limited, they should forage widely  
217 in the seagrass, which is a preferred food (Bilodeau 2019). Therefore, regular detection of  
218 reef herbivores out in the seagrass over multiple months could be taken as evidence refuting  
219 the landscape of fear at Lighthouse Reef.

220

### 221 *Spatial Arrangement*

222 Cameras were deployed in pairs at 21 patch reef sites within Lighthouse Reef Atoll.  
223 DEAC sites were distributed evenly inside and outside of the Half Moon Caye Natural  
224 Monument MPA in the southeastern corner of the atoll. Seven sites (3 inside the MPA, 4  
225 outside) featured predominantly algal bottom cover; the rest were in areas surrounded by  
226 seagrass, primarily *Thalassia testudinum*. Patch reef sites for camera deployment were  
227 chosen via random point placement using satellite imagery and a depth map of the atoll  
228 (courtesy of the Carnegie Airborne Observatory), which allowed sites to be evenly  
229 stratified across depths from 2-7 m.

230 Sites deeper than 4 m were initially avoided due to leakage of Housing 1 past this  
231 depth, although depths of up to 7 m (maximum depth required in the study) were  
232 successfully achieved with Housing 2, which was used for initial deployments in March  
233 2018 and all deployments from August 2018 onward. Cameras were deployed in sets of  
234 two, one camera located at the edge of the sandy halo surrounding a patch reef and the  
235 other located at least twice the halo's width away from the edge in the surrounding seagrass  
236 or algal benthic cover (Fig 2). In the case of particularly narrow halos, "control" cameras  
237 were placed a minimum of 15 m from the halo edge. This allowed control cameras a view

238 of the same bottom cover (seagrass or macroalgae) as that adjacent to the halo but placed  
239 them well beyond the fish density thresholds observed by Layman et al. (2013), while also  
240 accounting for the possibility that larger halos could represent reefs with larger or farther-  
241 ranging fish populations. “Halo” cameras had a relatively wide field of view, as is typical  
242 of terrestrial trail cameras, which included both the halo in front of them and the patch reef  
243 beyond. Both cameras were pointed toward the reef, although the edge of the halo was  
244 beyond the range of view for the grass (“control”) camera at most sites.

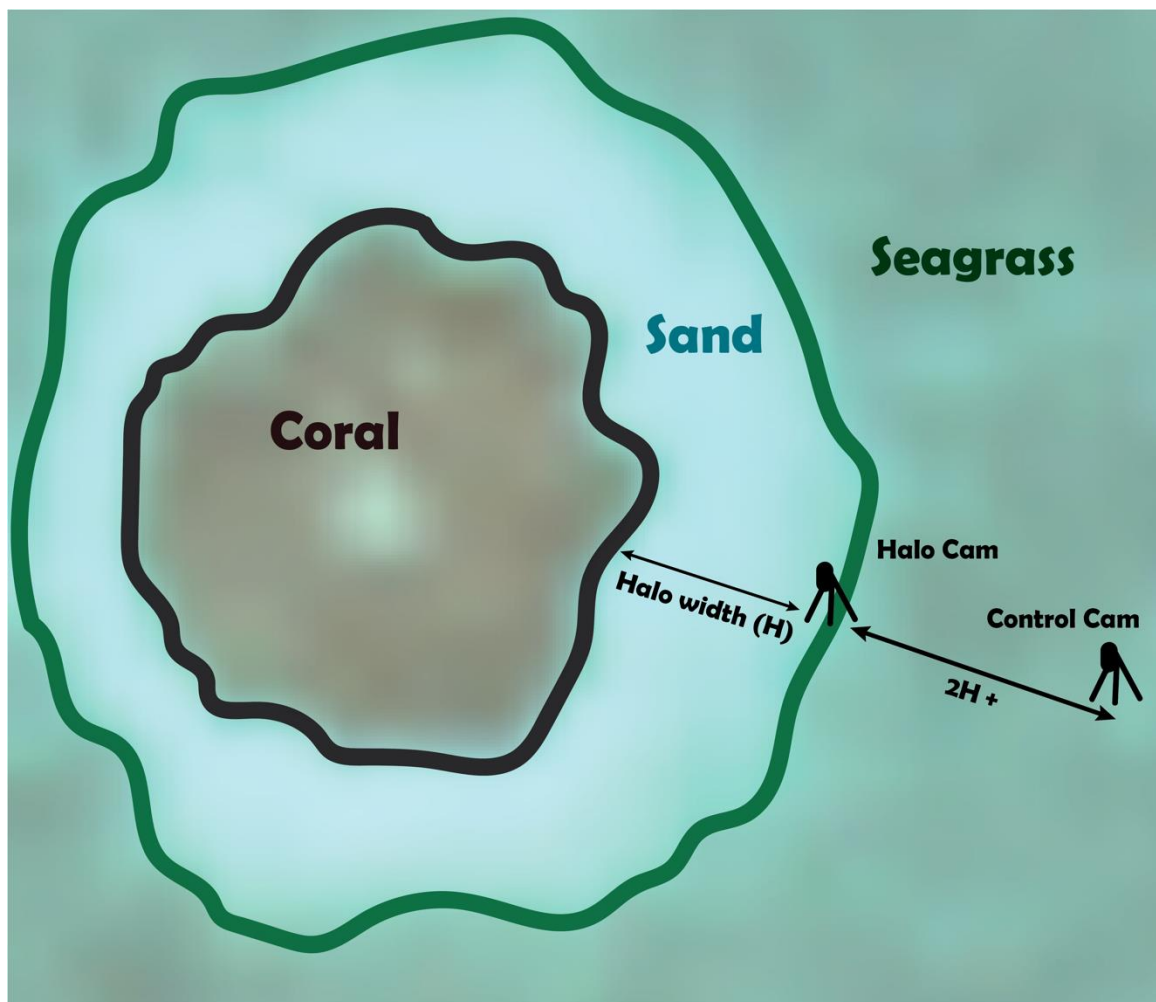

245

246 **Figure 2.** Camera arrangement at a patch reef site. One camera was placed in  
247 of the halo facing in toward the reef (“Halo Cam”), while the second (“Control Cam”)  
248 was placed twice the halo’s width away in the surrounding seagrass or algal cover, in line  
249 with the first camera.

250

251 *Monitoring and Secondary Deployments*

252 Camera deployments occurred in stages, with the first cameras deployed in March  
253 2018 and the last cameras collected in March 2019 (Fig S1). The longest-running DEACs  
254 remained continuously active underwater from August 2018 to January 2019, a five-month  
255 interval, and were still operating at retrieval. Initial deployment of cameras in March 2018  
256 included one camera at the edge of a halo and a second camera pointed at the first in order  
257 to assess whether the presence of the camera and stand had any effect on the presence or  
258 behavior of marine animals. Given that no effects of camera presence were noted in this  
259 initial test, doubling of cameras in this manner was discontinued for future deployments,  
260 with the two cameras at each site positioned to monitor different benthic environments and  
261 unable to see each other. During the summer of 2018 (June to August), cameras were  
262 consistently checked every 1-2 weeks for leakage, algal overgrowth, or stand displacement.  
263 Cameras deployed at longer intervals from March to June 2018, August 2018 to January  
264 2019, and January to March 2019 were unmonitored during these periods in order to test  
265 long-term underwater function and determine the effects of biofouling on housings and  
266 image quality in the absence of cleaning or regular adjustments.

267

268 *Diver Observations*

269 In-water observations were conducted by a team of 2-3 divers at each camera site  
270 and at several additional locations in order to validate the camera's ability to detect fish  
271 and other animals. Observations consisted of all divers sitting directly behind each camera  
272 for 15 minutes and recording the presence and abundance of all fish and other animals

273 observed on the reef, in the halo, or in the grass to the genus or species level, when possible.  
274 Divers faced forward toward the reef and recorded all fish observed within the halo or on  
275 the reef itself, as this was the primary field of view of the camera. In the seagrass or  
276 macroalgae, divers again faced toward the reef and recorded only fish that swam in front  
277 of them and the camera. Divers remained stationary for the entire observation period at  
278 each camera, and their presence did not have any observable effects on fish within the  
279 camera's view, with multiple fish of different species swimming quite close to divers  
280 during the observations. Fish species and counts were determined by a consensus of all the  
281 divers present at each observation. A non-metric multidimensional scaling (NMDS)  
282 analysis was run on species communities inside and outside of the halo using data from  
283 diver observations at 20 camera locations and species counts from 54 additional images  
284 taken in the 15-minute intervals before, during, and after the diver observations at 18 of  
285 those locations. Only images from immediately before, after, and during diver observations  
286 were used for comparison in order to control for natural variation in fish communities over  
287 time, since the main goal of the comparison was to assess the ability of the cameras to  
288 capture known community composition at a given location and time. All fish in this subset  
289 of images were identified to the genus or species level by the same researchers who  
290 conducted the in-water diver observations. To determine whether divers had any effect on  
291 fish presence, counts from images captured before, during, and after diver observations  
292 were compared using a nonparametric Friedman rank sum test and a Wilcoxon signed rank  
293 test for pairwise comparisons. All analyses were conducted using R statistical software  
294 version 4.0.3 (R Core Team 2020) with packages qdap (Rinker 2019), reshape (Wickham  
295 2007), rstatix (Kassambara 2020), and vegan (Oksanen et al. 2018).

296 **Image Analysis**

297 *Image Sorting*

298 Images were initially named and sorted by location, time, and date using the  
299 camtrapR (Niedballa et al. 2016) package in R (R Core Team 2020). A subset of over  
300 13,000 images were sorted by trained undergraduate student volunteers into categories  
301 containing at least one visible fish (“Fish”) and without any visible fish (“NoFish”). To  
302 ensure consistency, all volunteers were initially trained on the same subset of ~300  
303 images drawn from multiple different cameras and their accuracy assessed by the  
304 research team before they were assigned a larger subset of images to sort individually.  
305 Due to the nature of timed rather than motion or heat triggered photos, many images did  
306 not contain fish.

307

308 *Model Choice*

309 In order to streamline future analyses of fish photos and identification and avoid  
310 manual redundancy in discriminating fish existence in pictures, we built and trained a  
311 Convolutional Neural Network (CNN) based on ImageNet pretrained ResNet-50 (He et al.  
312 2016), a deep residual network widely used in image classification. We chose ResNet as  
313 our base structure because we wanted conservative results in classifying fish pictures.  
314 ResNet is powerful at preventing overfitting, making it less likely to omit pictures  
315 containing fish. The reproducible code was implemented in Pytorch (He et al. 2016, Paszke  
316 et al. 2017, Howard et al. 2018) to identify images with animals (Fig 3).

317

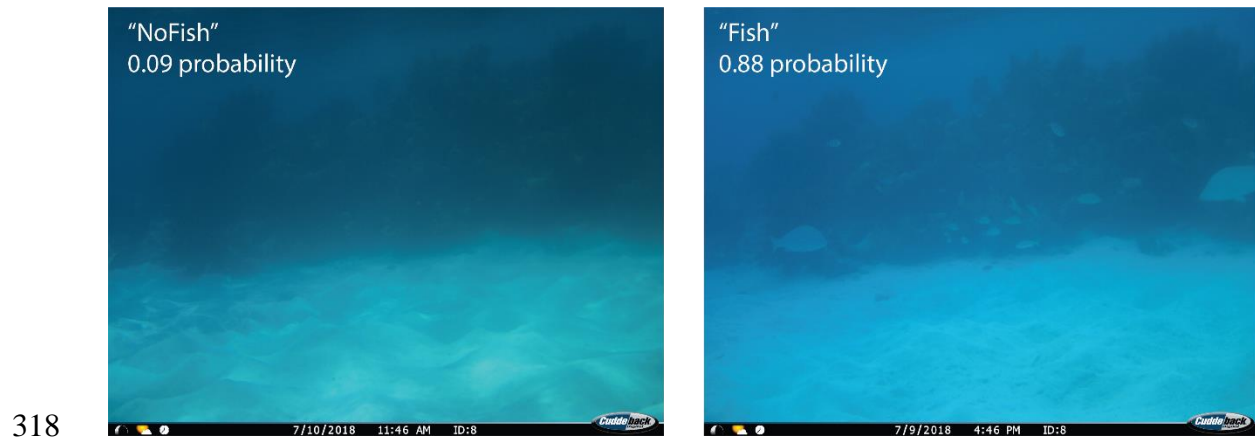

319 **Figure 3.** Empty (left) and fish-filled (right) images captured at the same camera site within  
320 24 hours. The empty or “NoFish” photo was assigned only a 0.09 probability of containing  
321 a fish by our ResNet-50 model, whereas the model predicted a 0.88 probability of the  
322 second photo containing at least one fish, hence its “Fish” designation. Probabilities like  
323 these were used to sort images into “Fish” and “NoFish” categories to streamline further  
324 analysis.

325

### 326 *Training and Validation*

327 Our model was trained on a sample of 10,727 images sorted by our team of  
328 trained volunteers and then run on 75,470 additional images to sort them into “Fish” and  
329 “NoFish” categories. To augment the training set, we preprocessed the fish images with  
330 spatial transformations, cropping and lightening variation, and used focal loss (Lin et al.  
331 2017) as an objective function to address the problem of imbalanced labels.

332

### 333 *Image Analysis*

334 Images with a “Fish” probability of 0.4 or above were used to determine the relative  
335 presence of fish at camera sites inside and outside of the Half Moon Caye MPA. A cutoff  
336 of 0.4 was chosen based on the model’s reduced ability to correctly identify fish presence,  
337 compared to fish absence. This analysis of fish occupancy was conducted based on the



338 relative proportions of the total images classified that did or did not contain fish inside and  
339 outside of the MPA and at patch reef and seagrass/algae locations.

340

341 RESULTS

## 342 **Camera Performance in the Field**

### 343 *Cameras and Housings*

344 Housing 1 proved vulnerable to flooding at depths exceeding 4 m and prone to  
345 leaking even at shallower depths. This appears to be due primarily to the thin nature of  
346 Housing 1's walls and lid, which deformed substantially under pressure, breaking the  
347 epoxy seal with the lens and allowing water to enter. Housing 2 proved far more robust to  
348 pressure and had minimal leakage even at a maximum deployed depth of 7 m over  
349 multiple months. Further testing with this housing will be necessary to determine its  
350 maximum functional depth, but preliminary tests with a revised housing design have  
351 reached depths of 40 m.

352 The cameras themselves proved resilient to flooding and were typically still  
353 armed and taking photos when extracted from partially-flooded housings. However,  
354 many cameras recovered from flooded housings were unable to be redeployed due to  
355 lasting damage to their internal systems. Batteries were sufficient to power the cameras  
356 past the five month extraction date of our longest deployment, with all non-flooded  
357 cameras still displaying the starting battery status of "OK" (not "LOW" or "DEAD").  
358 Maximum water temperature measured at any of our deployment sites, which could  
359 affect battery life, was 30° C (86° F). Cuddeback advertises that their cameras can  
360 operate up to 12 months continuously with efficient battery usage. Memory cards were

361 more than sufficient to store images on the schedule that they were collected during this  
362 period (approximately 8.5 GB of images over 5 months), suggesting that image frequency  
363 could be doubled or tripled in future deployments, assuming that processing of these  
364 additional images is sufficiently streamlined with the use of computer vision or similar  
365 techniques.

366

### 367 *Environmental Variability*

368 Different benthic environments and camera positioning affected the quality and  
369 interpretability or classification of images. In shallow seagrass and macroalgal  
370 environments, suspended organic matter in the water column reduced visibility,  
371 especially at certain times of day under specific light conditions. Suspended organics may  
372 also have contributed to high biofouling in these benthic environments (discussed below).  
373 Camera orientation with regard to compass direction was varied between sites during  
374 deployment, although both cameras at any given location were oriented in the same  
375 direction. While visibility due to the direction and angle of sunlight varied throughout the  
376 day at all locations, some orientations produced a greater number of poorly-lit images or  
377 images with strong light reflection off of suspended particles in the water column,  
378 reducing the overall image quality or number of usable images for those sites.

379

### 380 *Biofouling*

381 The most significant impediment to long-term camera function at our sites was  
382 biofouling, the growth of marine organisms over the camera housing and stands. Image  
383 quality declined rapidly due to biofouling, making fish identification impractical in as

384 little as one month depending on site conditions (Fig S2), with a median value of two  
385 months endurance, although imagery from some cameras remained usable up to four or  
386 five months after deployment. This biofouling decreased both fish detections in images  
387 and the ability of our model to accurately classify images taken by biofouled cameras  
388 (Fig S3, S4). Algal grazing by fish was an important factor reducing fouling on cameras  
389 and stands placed near patch reefs, while cameras placed in seagrass or algae beds away  
390 from patch reefs were overgrown with algae over the same deployment period that halo  
391 cameras remained relatively unobstructed (Fig 4). The addition of antifouling boat paint  
392 to the camera housings before the August 2019 deployment appeared to be only a minor  
393 deterrent to organisms growing on the housing in general and did not prevent the camera  
394 lens window from being almost completely obscured 2-3 months after deployment. In  
395 addition to biofouling, camera function was also limited by reduced visibility at certain  
396 sites, which varied based on local turbidity and light availability, and by depth.  
397 Preliminary tests of a similar camera design in Hawai'i suggest that the extreme  
398 biofouling observed at Lighthouse Reef is not representative of all such reef  
399 environments and may be related to especially high productivity and suspended organic  
400 matter in the water column at this location.

401

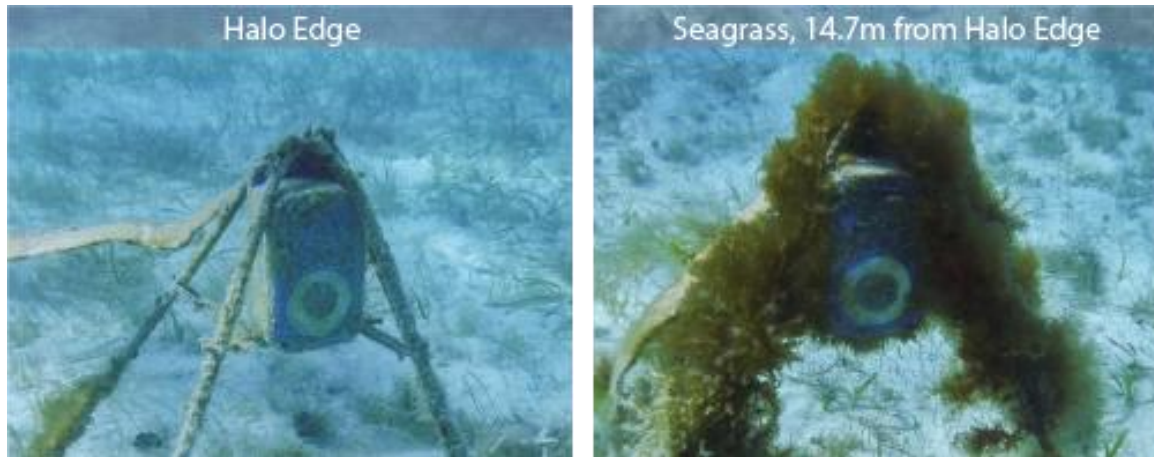

402  
403

404 **Figure 4.** Comparison of biofouling and algal overgrowth of structures placed at the edge  
405 of the halo, adjacent to seagrass (left), and in middle of the surrounding seagrass (right)  
406 after a month. Similar results seen across all camera sites suggest that reef-based  
407 herbivores help to control algal growth both within and at the edges of the halo but do not  
408 graze heavily, if at all, on algae and related marine organisms in the surrounding algal or  
409 seagrass beds.

410

#### 411 **Image Classification and Accuracy**

412 Of the 130,621 images collected, 88,899 were deemed usable (68%) based on a  
413 visual examination, despite some level of biofouling in many of these. Our ResNet-50-  
414 based model had an overall accuracy of 92.5% when classifying these images into “Fish”  
415 or “NoFish” categories, with higher accuracy in identifying empty or “NoFish” photos  
416 due to the increased number of these in the training dataset (Table 1).

417

418

419 **Table 1.** Accuracy of model predictions. Accuracy is determined by comparing the  
420 computer’s prediction for each image with the actual label of “Fish” (image contains at  
421 least one fish or similar animal) or “NoFish” (image is empty) assigned to the photo by a  
422 team of trained volunteers. The model was trained on 10,727 images classified by  
423 volunteers and then validated with an additional 2,702 human-sorted images, the results of  
424 which are shown in this table. Prediction accuracy is higher for “NoFish” (empty) images,  
425 likely due to the higher proportion of this type of image in both the training and validation  
426 datasets.  
427

| <b>True Image Designation</b> | <b>Correct Predictions</b> | <b>Incorrect Predictions</b> | <b>Percent Accuracy (%)</b> |
|-------------------------------|----------------------------|------------------------------|-----------------------------|
| <i>Fish</i>                   | 444                        | 165                          | 72.9                        |
| <i>NoFish</i>                 | 2057                       | 36                           | 98.3                        |
| <b>All images</b>             | <b>2501</b>                | <b>201</b>                   | <b>92.5</b>                 |

428

## 429 **Community Composition**

### 430 *Comparison with Diver Observations*

431 Large compositional differences were identified between the halo/reef and  
432 seagrass/algae fish communities but no obvious difference between the communities  
433 constructed from diver species observations and those from camera images (NMDS; Fig  
434 5), although individual images consistently contained fewer fish than were observed by  
435 divers during a 15-minute period at the same site (Fig S5). An ANOSIM conducted on  
436 the NMDS output showed a significant difference between the halo/reef and  
437 seagrass/algae communities ( $R=0.66$ ,  $p<0.001$ ), which was reflected in both the camera  
438 and diver species observations. Overall, there was a small but significant effect of time  
439 (before, during, or after diver presence) on fish counts (Friedman rank sum test  $p=0.0089$ ,  
440 Kendall’s  $W = 0.24$ ). Fish counts were significantly higher during diver observations  
441 compared to before (WSRT adj.  $p=0.021$ ), but there were no significant differences  
442 between the before and after time points (WSRT adj.  $p=0.83$ ) or during and after (WSRT

443 adj.  $p=0.34$ ), which suggests that divers did not have a consistent measurable effect on  
444 fish presence during these short observational periods.

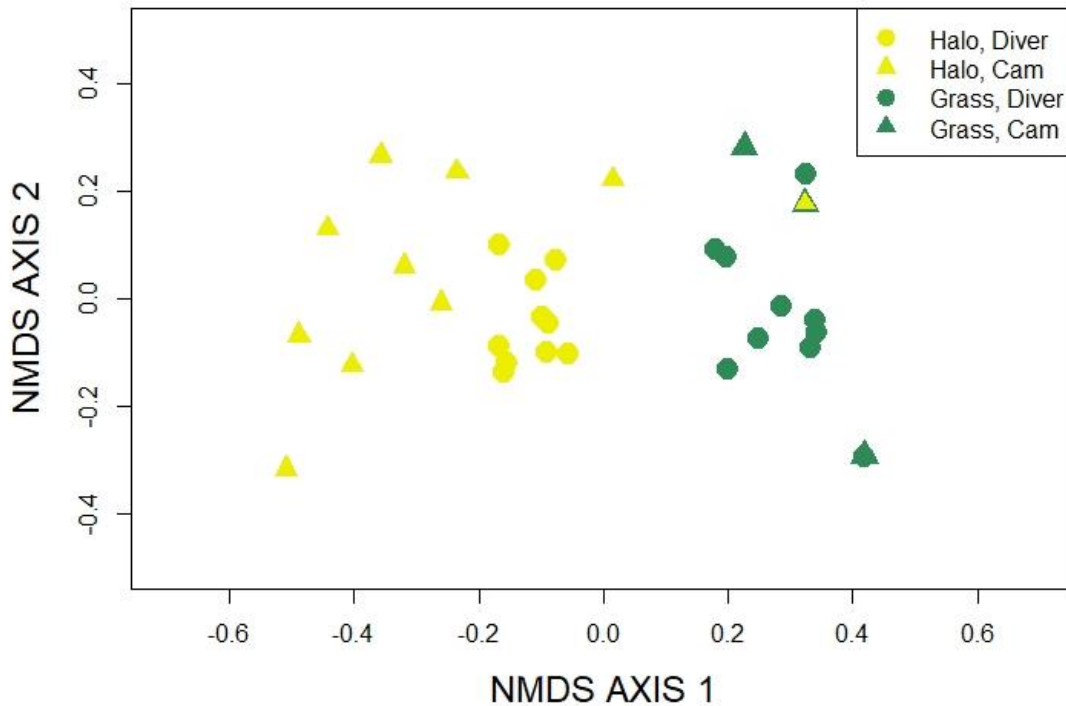

445

446 **Figure 5.** Non-metric multidimensional scaling (NMDS) based on 20 diver observations  
447 and an additional 54 camera images from the same sites. Points represent individual site  
448 observations or images and are colored yellow for halo/reef cameras and dark green for  
449 seagrass or algae cameras. ANOSIM of this NMDS output found a significant difference  
450 between halo/reef (yellow) and seagrass/algae (green) communities ( $R=0.66$ ,  $p<0.001$ ).  
451 Dots represent diver observations, while triangles represent camera images. Most image-  
452 based points fall within the same area as those from diver observations, illustrating that  
453 the cameras accurately captured the two different fish community types.

454

#### 455 *Fish Distributions*

456 The fish detection counts based on camera data revealed that the proportion of  
457 images with fish was 4.8 times higher in halos ( $0.38 \pm 0.002$ ) as compared to seagrass or  
458 algae camera locations ( $0.08 \pm 0.002$ ). MPA status also had a significant effect, with an

459 18% increase in the proportion of photos with fish within the MPA ( $0.26 \pm 0.002$ ),  
460 compared to outside the MPA ( $0.22 \pm 0.002$ ). Detailed analysis of camera locations  
461 relative to both benthic cover (i.e. reef/halo or algae/seagrass) and protection status  
462 (inside or outside MPA) revealed that fish detection is higher in halos outside of the  
463 MPA, relative to inside, but lower in seagrass communities outside of the MPA, relative  
464 to inside (Fig 6).

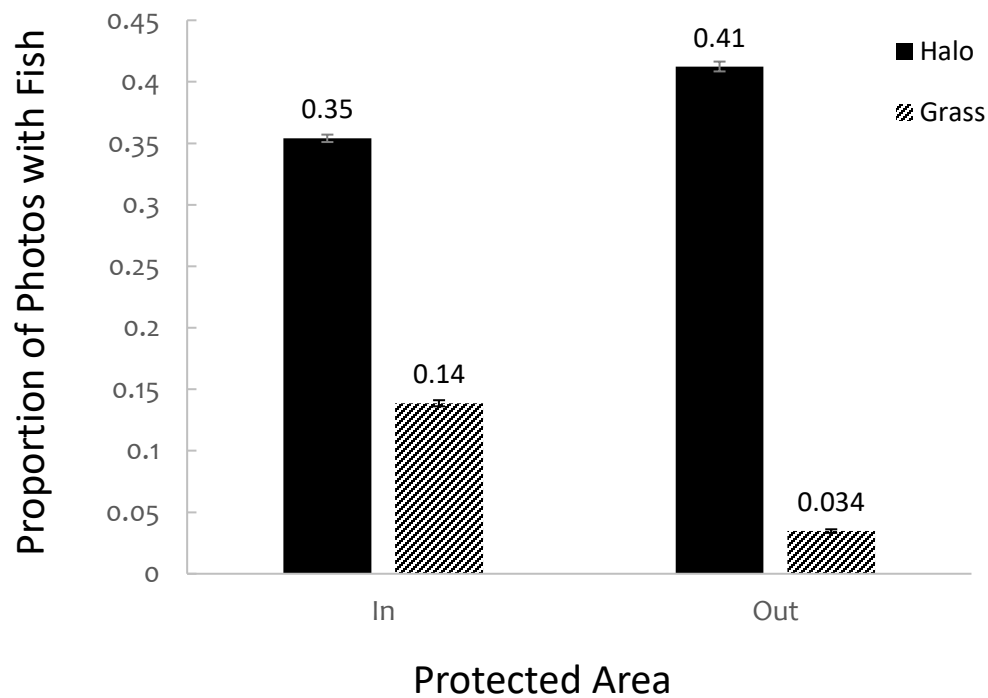

465

466 **Figure 6.** Proportion of images containing fish at halo and grass/algae sites inside and  
467 outside of the Half Moon Caye MPA. Proportions calculated to two significant figures are  
468 indicated above each bar. Error bars represent  $\pm 1$  standard error of the mean from the  
469 binomial distribution ( $\leq 0.004$ ).

470

471 A preliminary analysis of diver observations from 20 camera locations as well as  
472 an additional 60 images from those sites did not contain a single instance of an  
473 herbivorous reef fish (surgeonfish and all adult parrotfish except for *Sparisoma radians*)  
474 outside of a halo.

475

476

## DISCUSSION

477

### **Camera Performance**

478

#### *Deployment Duration and Function*

479

480

481

482

483

484

485

486

487

488

489

490

491

492

493

494

495

496

497

Underwater camera traps proved to be energy-efficient, durable, and capable of producing large volumes of quality images representative of the fish communities at their locations. The DEAC camera trap design is a reliable, cost-effective, and easy-to-implement solution allowing the expansion of terrestrial camera trapping techniques to shallow marine environments. The set-up can easily be used to vastly expand the capability of BRUVs and associated techniques (Cappo, Speare, & De'ath, 2004; Colton & Swearer, 2010; Brooks, Sloman, Sims, & Danylchuk, 2011), and can also provide marine observations over periods of months. In addition to being long-term and more scalable, un-baited camera traps such as these may be more accurate than BRUVs in their estimation of population and community composition (Mccoy et al. 2011) and allow the use of random encounter models for occupancy that are widely used with terrestrial camera traps (Rowcliffe et al. 2014).

Camera placement and orientation is an important consideration when deploying DEACs in the field, and the ideal placement may vary with geographic location, season, target time of day, water quality, and shading from local structures like patch reefs or docks. The cameras have no observable effect on the behavior of marine animals and may therefore be used to document species that typically evade divers. Even cameras that are “cleaned” by herbivorous fish in the halo do not appear to attract any more attention than natural patches of algae or coral rubble. They are also capable of remaining



498 underwater at depth for long periods and recording high volumes of photo or video  
499 observations—our longest running cameras were deployed for 5 months, captured over  
500 7,500 images each, and still had battery life to extend to a year. The exceptional duration  
501 and the ability to capture vast numbers of images, and to automatically recognize photos  
502 with fish (see below) gives the capability to not only provide a continuous record of rare  
503 species behaviors or visits by transient species that divers would miss or only observe by  
504 chance, but to also, for the first time, to record changes in behavior, relative abundance,  
505 and migrations across seasons and lunar phases.

506

#### 507 *Comparison to Existing Methods*

508 DEACs offer significant advantages over existing underwater camera options, as  
509 well as surveys by divers. These underwater camera traps record similar data to that  
510 gathered by in-person observations, with a few notable exceptions. While the longer time  
511 interval chosen for our extended duration field tests did not capture as many individual  
512 fish in each image as divers recorded during the same 15-minute period corresponding to  
513 a single photo, the cameras did accurately capture the composition of the community  
514 during that time, with regard to both species presence and abundance (Fig 5). Analysis of  
515 synchronous diver and camera observations at different sites reflected obvious  
516 differences in community composition between different benthic environments. These  
517 compositional differences also support the placement of the halo and control cameras at  
518 each site, suggesting that the cameras were separated enough to capture these different  
519 adjacent community types while remaining close enough to control for local site  
520 conditions. The only group of animals observed by divers that were not well captured by

521 DEAC images were schools of roving juvenile fish and small parrotfish that camouflage  
522 well within seagrass and algal environments and are best detected through movement.  
523 The inability of the camera images and corresponding CNN to identify these fish may be  
524 due to a combination of more limited image quality in these turbid environments and the  
525 inability of human sorters (on whose data the CNN was trained) to distinguish these small  
526 fish later in a static image. Since these species are neither significant grazers (in terms of  
527 biomass consumed) nor threatening predators, their detection or inclusion in fish  
528 community composition was relatively unimportant for addressing the question used here  
529 to assess DEAC utility. However, for applications where detection of these species or  
530 similarly small or cryptic organisms is important, use of short video clips in place of still  
531 images (an option readily enabled with the DEAC design) could increase the ability of  
532 both humans and machines to detect these animals through motion.

533         The current duration of camera operation is over an order of magnitude longer  
534 than the operational duration achieved by other non-tethered underwater cameras (e.g.  
535 Williams et al., 2014; Siddiqui et al., 2018), even with biofouling seriously impairing  
536 image quality after 1-2 months (Fig S2). To the best of our knowledge, these are the first  
537 underwater camera traps to be affordable, power-efficient (therefore deployable over the  
538 span of months) and also self-contained, without the challenges imposed by a surface-  
539 tethered external power source, which typically limits deployment in remote regions and  
540 at multiple sites over large areas.

541

542 *Future Improvements*

543           The greatest immediate limitation to the camera design was the inability to  
544 prevent or seriously reduce biofouling without periodic manual cleaning of the cameras,  
545 although the magnitude of this challenge may be location-specific. Biofouling is a  
546 common problem with unsupervised underwater monitoring equipment (Delauney &  
547 Compère, 2009), with multiple solutions proposed to control it, including local  
548 chlorination (Delauney & Compère, 2009; Xue et al., 2015), copper sheeting and mesh,  
549 and UV radiation (Patil, Kimoto, Kimoto, & Saino, 2007). Ongoing tests of camera and  
550 housing design are incorporating these methods to reduce biofouling by marine  
551 organisms and extend the functional life of the lens window to better reflect the power  
552 and storage capabilities of the camera.

553           While both the batteries and memory cards we employed were sufficient for the  
554 deployment duration and image capture frequency tested, the inability to utilize memory  
555 cards with greater than 32GB of storage in Cuddeback cameras is problematic with a  
556 more frequent time lapse interval or in the case of short videos collected in place of single  
557 images. Therefore, optimizing and expanding both power and data storage capacity of  
558 these cameras via commercial means (cameras with larger SD storage capability) or  
559 noncommercial modifications is another potentially valuable direction for future research.  
560 For example, SD Ultra Capacity (SDUC) storage media currently affords 2 TB of  
561 storage, vastly expanding the capability of underwater camera traps for either smaller  
562 time intervals between images or multi-year deployments. Indeed, large storage capacity  
563 may obviate the need for camera triggering, making time-lapse or video with on-board

564 object recognition a superior alternative, giving the ability to capture even rare or  
565 transient species while effectively using the millions of potential images generated.

566 Design improvements currently in progress focus on reducing biofouling,  
567 extending the depth range of the camera housings to over 50 m, and implementing an  
568 external flash or other nighttime illumination.

569

## 570 **Image Analysis**

571 The success of our initial image sorting using the CNN ResNet-50 illustrates the  
572 power of machine learning and computer vision techniques to drastically reduce time and  
573 cost when dealing with large image sets. Our ability to use this trained model to pre-sort  
574 images with high accuracy before attempting further analysis via manual or autonomous  
575 machine-learning based methods also reduces the cost of the most disadvantageous  
576 aspect of our timed image capture method: the number of frames with no objects of  
577 interest to the current study. Now that datasets obtained from this and similar shallow  
578 marine environments can be easily sorted to exclude non-target images, future  
579 underwater camera trap projects using a similar time-lapse method will be able to quickly  
580 remove the majority of empty frames, while retaining the ability to measure frequency of  
581 detection events and variations in fish presence by time of day, season, or other  
582 environmental variables by comparison of occupied and empty images. Expansion of the  
583 deep neural network model to focus on identification of individual species, functional  
584 groups, and/or the sizes of different individuals, as has been done in similar image  
585 analyses (Boom et al. 2014, Boussarie et al. 2016, Siddiqui et al. 2018, Norouzzadeh et  
586 al. 2018), will further streamline the analysis of this and related large image datasets.

587           Our community composition analysis also demonstrates that the 15 minute photo  
588 interval of our cameras was sufficient to capture species representative of the same fish  
589 community observed by divers in the water. This suggests that while a single image does  
590 not capture every fish active in the area during the 15 minute period it represents, the  
591 collection of images from any given site are representative of the community at that  
592 location and are likely to accurately reflect changes in species behavior, abundance, or  
593 diversity at the site over a range of time scales (e.g. daily vs. seasonal changes). Further  
594 study of camera captures vs. diver observations regarding species known to be wary of  
595 divers, either those using traditional open-circuit SCUBA or closed-circuit rebreathers, is  
596 an important line of future investigation to understand true reef fish occupancy and  
597 abundance.

598           Our analysis of the number of images with fish collected at different groups of  
599 cameras revealed a difference undetected by the fish counts from our diver observations,  
600 showing that fish were detected by cameras more frequently (and are therefore likely to  
601 have higher occupancy) in halos outside of the MPA, while fish were detected in seagrass  
602 or algal habitats more frequently inside of the MPA. The results of this apparent  
603 interaction between benthic cover and protected status illustrate the complexity of  
604 patterns and variation within the benthos and the fish communities at Lighthouse Reef.  
605 Further image analysis and modeling may help to distinguish the underlying causes of  
606 such variation. The inability of traditional diver surveys alone to detect these differences  
607 at all reinforces the value of spatially-distributed, long-term datasets like the images  
608 collected from our cameras. The observed differences in fish detection between halo and  
609 grass/algae control sites also reinforce diver observations of both less fish and a different

610 fish community in the algae or seagrass beds away from the reef and support the results  
611 of the community composition analysis (Fig 5).

612

### 613 **Case-Study and Future Applications**

614 We obtained a large volume of usable images from sites with a variety of depths  
615 and benthic cover types, subjected to different fishing pressures inside and outside of a  
616 local MPA, and monitored over the course different seasons. This allows us to reasonably  
617 conclude that our observations are likely representative of fish presence and behavior at  
618 patch reef sites within Lighthouse Reef Atoll as a whole. The complete lack of grazing  
619 reef fish observed outside of the halo region by cameras located in surrounding sea grass  
620 within 30 m or less of the halo supports the idea that a predator modification of prey fish  
621 behavior imposes real constraints on fish movement and that heightened grazing pressure  
622 adjacent to reef structures is not simply the result of fish randomly dispersing with  
623 distance from the reef. If the latter were true, the pattern would be a simple exponential  
624 decrease in fish as distance from the patch reef increased, which would likely be reflected  
625 in a lower (but nonzero) number of grazing fish detected at seagrass and algae camera  
626 locations, compared to those at the halo edge. An alternative hypothesis is that the lack of  
627 grazing fish appearing in images taken outside of the halo is due to unequal detection of  
628 fish between the two environments, possibly the result of faster or more furtive  
629 movements outside the relative safety of the halo. However, this explanation is refuted by  
630 two pieces of evidence: First, diver observation also showed no herbivorous reef fish at  
631 grass or algal camera sites, and, second, other fish species that were observed by divers to  
632 move quickly through the seagrass or algal environment (e.g. bar jacks, *Caranx ruber*)

633 appear in both halo and control camera images, indicating that cameras placed in the  
634 grass are very capable of photographing fish moving through that environment. It is  
635 therefore more likely that the complete lack of detection of reef-based grazers outside of  
636 the halo, even though their food is in much higher supply there, is due to their total or  
637 near-total absence from this environment because of the combined lack of shelter and  
638 exposure to predators.

639         This study demonstrates the value of long-term, spatially-distributed underwater  
640 camera trap observations for addressing a subtle difference in fish communities and  
641 benthic pattern generation. DEACs can be easily deployed alone or in large spatial arrays  
642 for short or extended time periods, and they are capable of recording periodic still images  
643 for long-term studies or short videos for detailed behavioral observations. Most  
644 importantly, these cameras are highly energy-efficient and require little-to-no  
645 maintenance while deployed, making them ideal for remote locations or extended  
646 observations that surface-anchored systems or commercial underwater cameras with  
647 limited battery life are not suitable for. Multiple networks of camera traps like TEAM  
648 (Beaudrot et al. 2016) and Snapshot Serengeti (Norouzzadeh et al. 2018) have been  
649 successfully deployed over large regions in terrestrial environments, and DEACs offer  
650 the option to now expand such long-term, spatially-extensive monitoring efforts to the  
651 marine realm. The use of a CNN makes processing the volume of images collected over  
652 such a long-term study a practical option, and continuing advancements in machine  
653 learning and computer vision are likely to enable further processing of similar large  
654 visual datasets in the future.

655

656

657

#### ACKNOWLEDGEMENTS

658 We thank the Belize Audubon Society for hosting us at Half Moon Caye and assisting  
659 with data collection, especially Eli Romero, Dominique Lizama, and Shane Young. This  
660 work was conducted under Belize Fisheries Permit 00021-18 and was partially funded by  
661 the Wake Forest Center for Energy, Environment, and Sustainability, a Wake Forest  
662 University Richter Scholarship, Sullivan Scholarship, and Undergraduate Research  
663 Fellowship to Austin Schwartz and a Wake Forest University Vecellio Grant to Stephanie  
664 Bilodeau. We thank Greg Asner and the Carnegie Airborne Observatory/ASU Center for  
665 Global Discovery and Conservation Science for use of their depth models. We also thank  
666 Elvis Solis for logistics help and counsel, Connor Walsh and John Gorelick for help in  
667 the field and in the lab, and all undergraduates who contributed to classifying and  
668 analyzing the data, especially Tatianna Stroud and Joseph Chen.

669

670

#### AUTHOR CONTRIBUTIONS

671 SB and MS conceived the ideas and designed the camera trap methodology. BX and VPP  
672 designed and trained the machine learning model. SB, AS, and MS collected the data. SB  
673 and BX analyzed the data. All authors contributed to the drafts and gave final approval  
674 for publication.

675



676

REFERENCES

677

678 Beaudrot, L., J. A. Ahumada, T. O'Brien, P. Alvarez-Loayza, K. Boekee, A. Campos-

679 Arceiz, D. Eichberg, S. Espinosa, E. Fegraus, C. Fletcher, K. Gajapersad, C.

680 Hallam, J. Hurtado, P. A. Jansen, A. Kumar, E. Larney, M. G. M. Lima, C.

681 Mahony, E. H. Martin, A. McWilliam, B. Mugerwa, M. Ndoundou-Hockemba, J.

682 C. Razafimahaimodison, H. Romero-Saltos, F. Rovero, J. Salvador, F. Santos, D.

683 Sheil, W. R. Spironello, M. R. Willig, N. L. Winarni, A. Zvoleff, and S. J.

684 Andelman. 2016. Standardized assessment of biodiversity trends in tropical forest

685 protected areas: The end is not in sight. *PLOS Biology* 14:e1002357.

686 Bilodeau, S. M. 2019. Ecological Process in Pattern Generation in Tropical Coral-

687 Seagrass Reefscapes. M.S., Wake Forest University, United States -- North

688 Carolina.

689 Bohnsack, J. A. 1989. Are high densities of fishes at artificial reefs the result of habitat

690 limitation or behavioral preference? *Bulletin of Marine Science* 44:15.

691 Boom, B. J., J. He, S. Palazzo, P. X. Huang, C. Beyan, H.-M. Chou, F.-P. Lin, C.

692 Spampinato, and R. B. Fisher. 2014. A research tool for long-term and continuous

693 analysis of fish assemblage in coral-reefs using underwater camera footage.

694 *Ecological Informatics* 23:83–97.

695 Boussarie, G., N. Teichert, R. Lagarde, and D. Ponton. 2016. BichiCAM, an Underwater

696 Automated Video Tracking System for the Study of Migratory Dynamics of

697 Benthic Diadromous Species in Streams. *River Research and Applications*

698 32:1392–1401.

- 699 Brooks, E. J., K. A. Sloman, D. W. Sims, and A. J. Danylchuk. 2011. Validating the use  
700 of baited remote underwater video surveys for assessing the diversity, distribution  
701 and abundance of sharks in the Bahamas. *Endangered Species Research* 13:231–  
702 243.
- 703 Burkepile, D. E. 2013. Comparing aquatic and terrestrial grazing ecosystems: is the grass  
704 really greener? *Oikos* 122:306–312.
- 705 Burton, A. C., E. Neilson, D. Moreira, A. Ladle, R. Steenweg, J. T. Fisher, E. Bayne, and  
706 S. Boutin. 2015. REVIEW: Wildlife camera trapping: a review and  
707 recommendations for linking surveys to ecological processes. *Methods in Ecology*  
708 *and Evolution*:675–685.
- 709 Cappo, M., P. Speare, and G. De'ath. 2004. Comparison of baited remote underwater  
710 video stations (BRUVS) and prawn (shrimp) trawls for assessments of fish  
711 biodiversity in inter-reefal areas of the Great Barrier Reef Marine Park. *Journal of*  
712 *Experimental Marine Biology and Ecology* 302:123–152.
- 713 Colton, M. A., and S. E. Swearer. 2010. A comparison of two survey methods:  
714 differences between underwater visual census and baited remote underwater  
715 video. *Marine Ecology Progress Series* 400:19–36.
- 716 Cutler, T. L., and D. E. Swann. 1999. Using remote photography in wildlife ecology: a  
717 review. *Wildlife Society Bulletin (1973-2006)* 27:571–581.
- 718 Giles, J. W., and I. N. Bankman. 2005. Underwater optical communications systems. Part  
719 2: basic design considerations. Pages 1700-1705 Vol. 3 MILCOM 2005 - 2005  
720 IEEE Military Communications Conference.

- 721 Hammerschlag, N., A. C. Broderick, J. W. Coker, M. S. Coyne, M. Dodd, M. G. Frick,  
722 M. H. Godfrey, B. J. Godley, D. B. Griffin, K. Hartog, S. R. Murphy, T. M.  
723 Murphy, E. R. Nelson, K. L. Williams, M. J. Witt, and L. A. Hawkes. 2015.  
724 Evaluating the landscape of fear between apex predatory sharks and mobile sea  
725 turtles across a large dynamic seascape. *Ecology* 96:2117–2126.
- 726 He, K., X. Zhang, S. Ren, and J. Sun. 2016. Deep residual learning for image recognition.  
727 Pages 770–778 2016 IEEE Conference on Computer Vision and Pattern  
728 Recognition (CVPR). IEEE, Las Vegas, NV, USA.
- 729 Howard, J. and others. 2018. fastai. GitHub.
- 730 Kassambara, A. 2020. rstatix: Pipe-Friendly Framework for Basic Statistical Tests.
- 731 Ko, D., B. Gu, and J. Kim. 2018. Analysis of the luring characteristics of phototactic  
732 fishes under LED illumination in water 13:4.
- 733 Layman, C. A., J. E. Allgeier, L. A. Yeager, and E. W. Stoner. 2013. Thresholds of  
734 ecosystem response to nutrient enrichment from fish aggregations. *Ecology*  
735 94:530–536.
- 736 Lin, T.-Y., P. Goyal, R. Girshick, K. He, and P. Dollár. 2017. Focal loss for dense object  
737 detection. Pages 2980–2988 The IEEE International Conference on Computer  
738 Vision (ICCV).
- 739 Madin, E. M. P., J. S. Madin, and D. J. Booth. 2011. Landscape of fear visible from  
740 space. *Scientific Reports* 1.
- 741 Marini, S., E. Fanelli, V. Sbragaglia, E. Azzurro, J. D. R. Fernandez, and J. Aguzzi. 2018.  
742 Tracking fish abundance by underwater image recognition. *Scientific Reports*  
743 8:13748.

- 744 McCauley, D. J., P. A. DeSalles, H. S. Young, J. P. A. Gardner, and F. Micheli. 2016.  
745 Use of high-resolution acoustic cameras to study reef shark behavioral ecology.  
746 *Journal of Experimental Marine Biology and Ecology* 482:128–133.
- 747 Mccooy, J. C., S. S. Ditchkoff, and T. D. Steury. 2011. Bias associated with baited camera  
748 sites for assessing population characteristics of deer. *The Journal of Wildlife*  
749 *Management* 75:472–477.
- 750 Niedballa, J., R. Sollmann, A. Courtiol, and A. Wilting. 2016. camtrapR: an R package  
751 for efficient camera trap data management. *Methods in Ecology and Evolution*  
752 7:1457–1462.
- 753 Norouzzadeh, M. S., A. Nguyen, M. Kosmala, A. Swanson, M. S. Palmer, C. Packer, and  
754 J. Clune. 2018. Automatically identifying, counting, and describing wild animals  
755 in camera-trap images with deep learning. *Proceedings of the National Academy*  
756 *of Sciences* 115:E5716–E5725.
- 757 Oksanen, J., F. G. Blanchet, M. Friendly, R. Kindt, P. Legendre, D. McGlenn, P. R.  
758 Minchin, R. B. O’Hara, G. L. Simpson, P. Solymos, M. H. H. Stevens, E. Szoecs,  
759 and H. Wagner. 2018. *vegan: Community ecology package*.
- 760 Paszke, A., S. Gross, S. Chintala, G. Chanan, E. Yang, Z. DeVito, Z. Lin, A. Desmaison,  
761 L. Antiga, and A. Lerer. 2017. *Automatic differentiation in PyTorch*.
- 762 R Core Team. 2020. *R: A language and environment for statistical computing*. R  
763 *Foundation for Statistical Computing, Vienna, Austria*.
- 764 Rinker, T. W. 2019. *qdap: Quantitative discourse analysis package*. Buffalo, New York,  
765 *New York, USA*.

- 766 Rowcliffe, J. M. 2017. Key frontiers in camera trapping research. *Remote Sensing in*  
767 *Ecology and Conservation* 3:107–108.
- 768 Rowcliffe, J. M., C. Carbone, R. Kays, B. Kranstauber, and P. A. Jansen. 2014. Density  
769 estimation using camera trap surveys: the random encounter model. Pages 317–  
770 324 in P. Meek and P. Fleming, editors. *Camera Trapping: Wildlife Management*  
771 *and Research*. CSIRO Publishing, Melbourne, Australia.
- 772 Sale, P. F., and W. A. Douglas. 1984. Temporal variability in the community structure of  
773 fish on coral patch reefs and the relation of community structure to reef structure.  
774 *Ecology* 65:409–422.
- 775 Siddiqui, S. A., A. Salman, M. I. Malik, F. Shafait, A. Mian, M. R. Shortis, and E. S.  
776 Harvey. 2018. Automatic fish species classification in underwater videos:  
777 exploiting pre-trained deep neural network models to compensate for limited  
778 labelled data. *ICES Journal of Marine Science* 75:374–389.
- 779 Steenweg, R., M. Hebblewhite, R. Kays, J. Ahumada, J. T. Fisher, C. Burton, S. E.  
780 Townsend, C. Carbone, J. M. Rowcliffe, J. Whittington, J. Brodie, J. A. Royle, A.  
781 Switalski, A. P. Clevenger, N. Heim, and L. N. Rich. 2017. Scaling-up camera  
782 traps: monitoring the planet’s biodiversity with networks of remote sensors.  
783 *Frontiers in Ecology and the Environment* 15:26–34.
- 784 Villon, S., D. Mouillot, M. Chaumont, E. S. Darling, G. Subsol, T. Claverie, and S.  
785 Villéger. 2018. A Deep Learning method for accurate and fast identification of  
786 coral reef fishes in underwater images. *Ecological Informatics* 48:238–244.
- 787 Wickham, H. 2007. Reshaping data with the reshape package. *Journal of Statistical*  
788 *Software* 21:1–20.

789 Wickham, H. 2009. ggplot2: Elegant Graphics for Data Analysis. Springer-Verlag, New  
790 York.

791 Williams, K., A. De Robertis, Z. Berkowitz, C. Rooper, and R. Towler. 2014. An  
792 underwater stereo-camera trap. *Methods in Oceanography* 11:1–12.

793
